# Supplementary material for: Probe-level estimation improves the detection of differential splicing in Affymetrix exon array studies
Source: PubMed Central journal article supplement (PMC2728531; doi:10.1186/gb-2009-10-7-r77), 2009-07-16

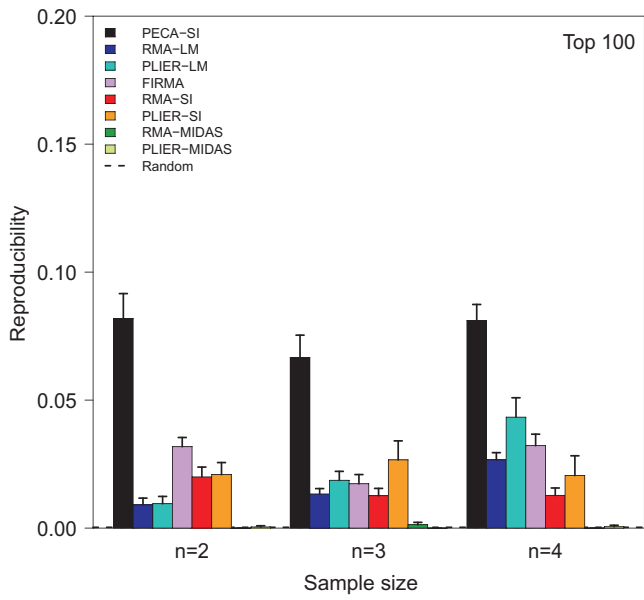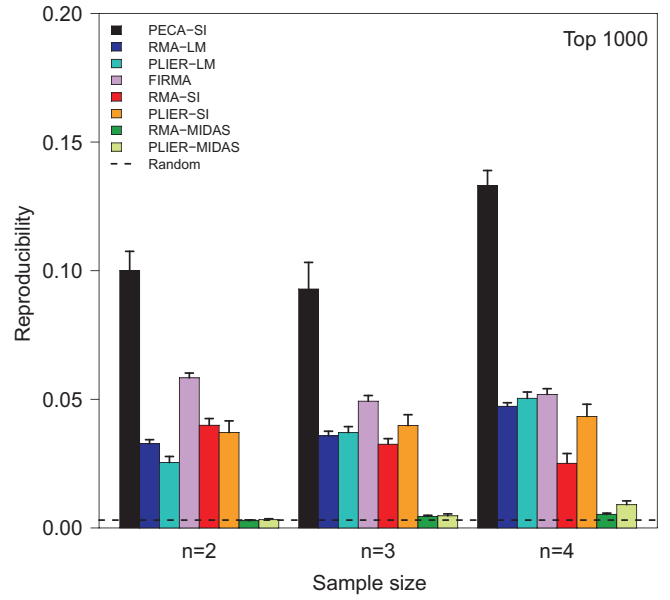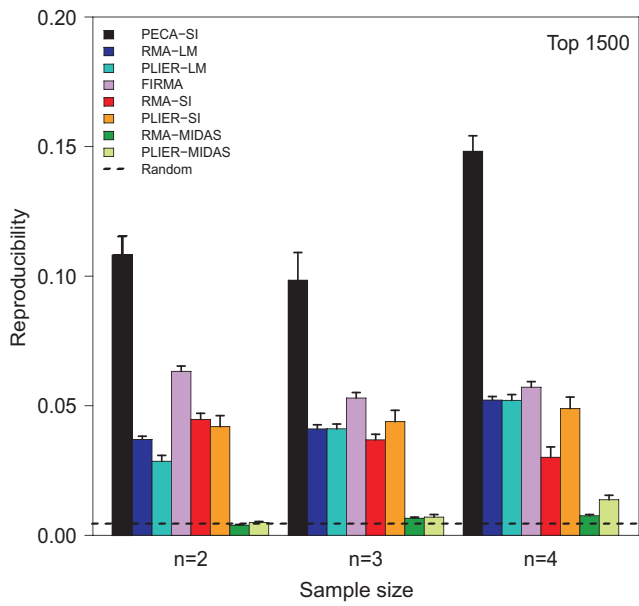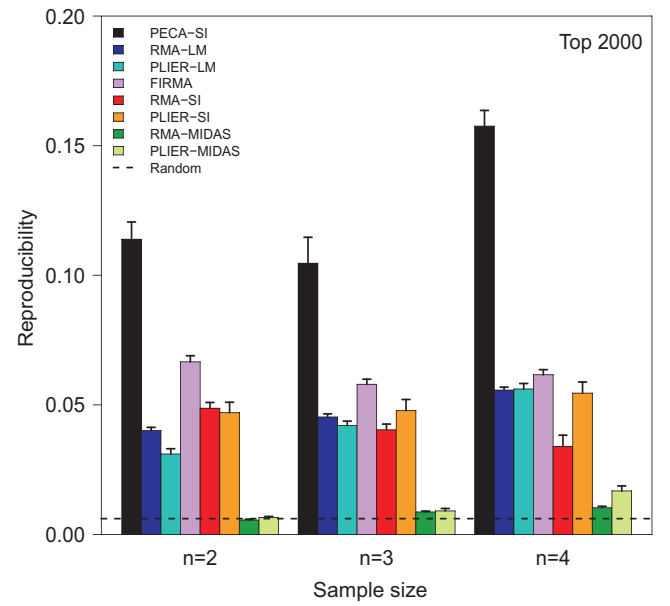

Supplement: gb-2009-10-7-r77-S3.pdf [file gb-2009-10-7-r77-S3.pdf]
